# Supplementary material
Source: ML conference proceedings conference paper supplement (https://openreview.net/forum?id=cJgHzw8Qhq)

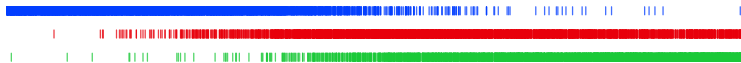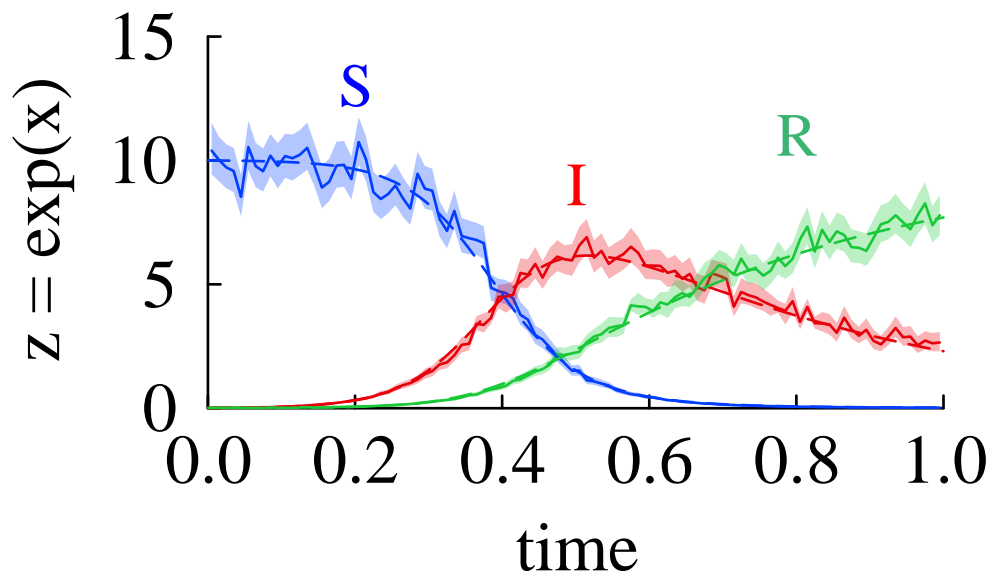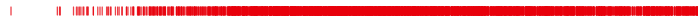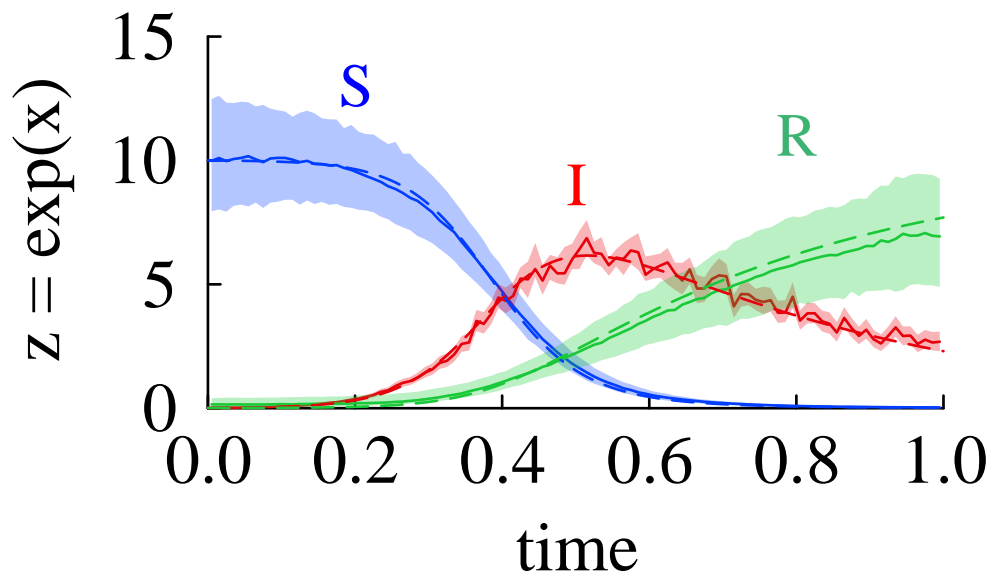

Supplement: supplementary_material [file attachment]

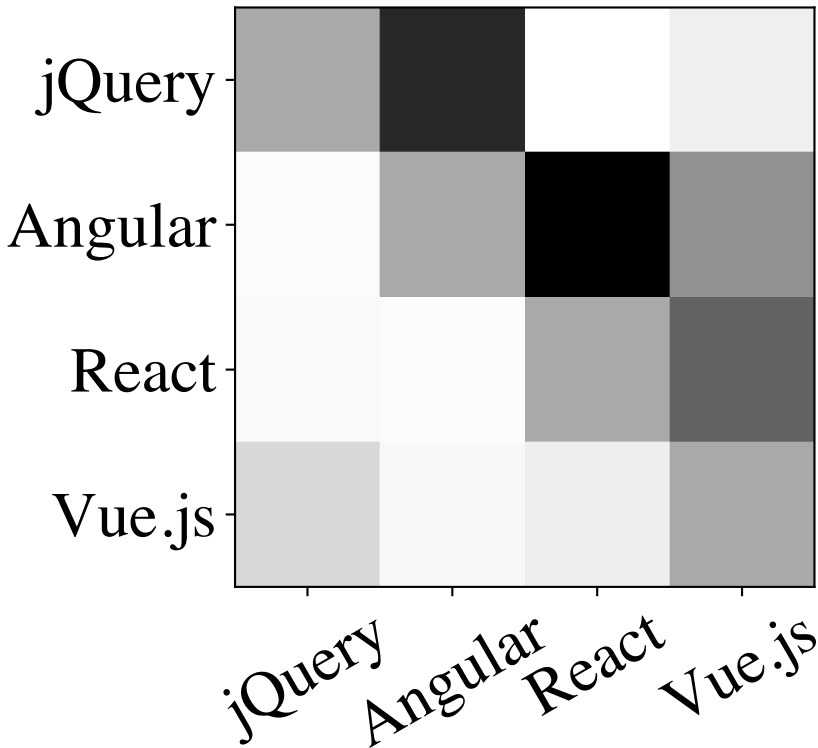

Supplement: supplementary_material [file attachment]

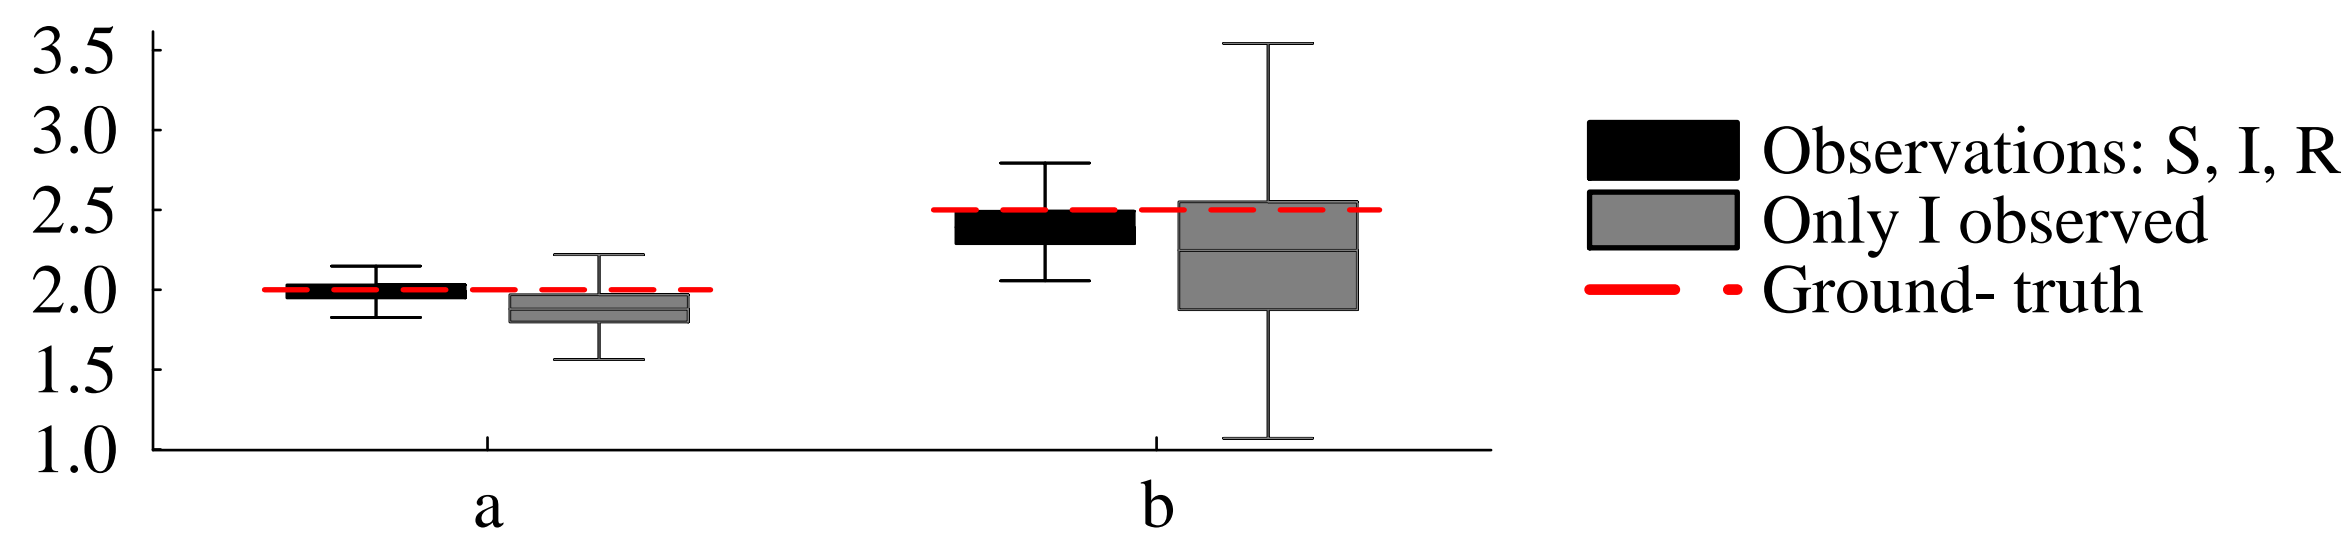

Supplement: supplementary_material [file attachment]

synthesized  
events

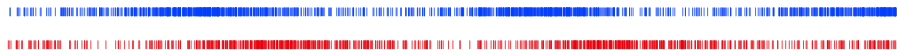

LGCP

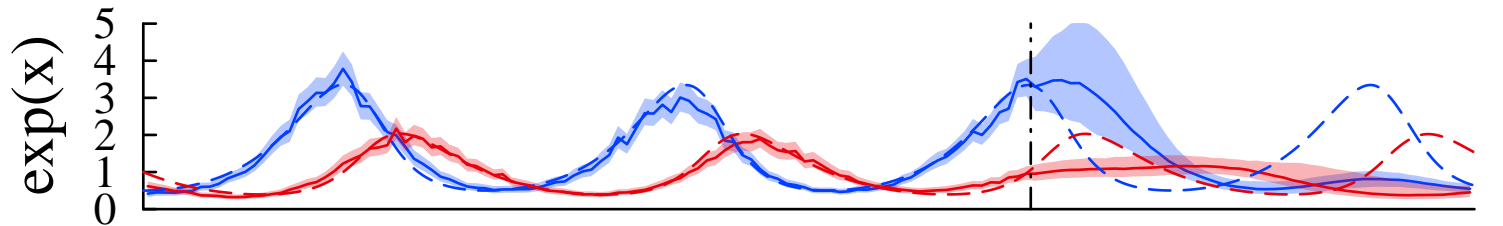

LGCP- GM  
(ours)

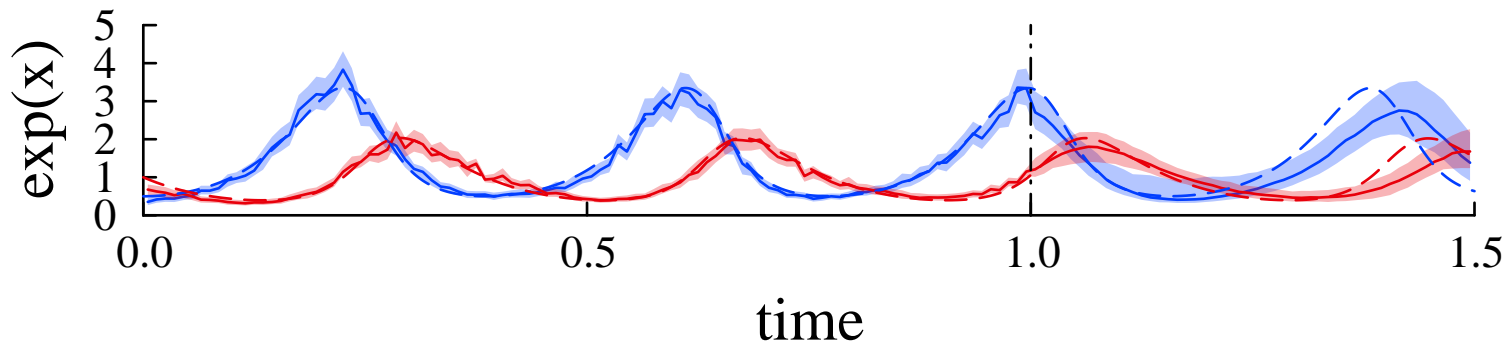

Supplement: supplementary_material [file attachment]

Interest

jQuery  
Angular  
React  
Vue.js

2005

2010

2015

2020

Year

100  
80  
60  
40  
20  
0

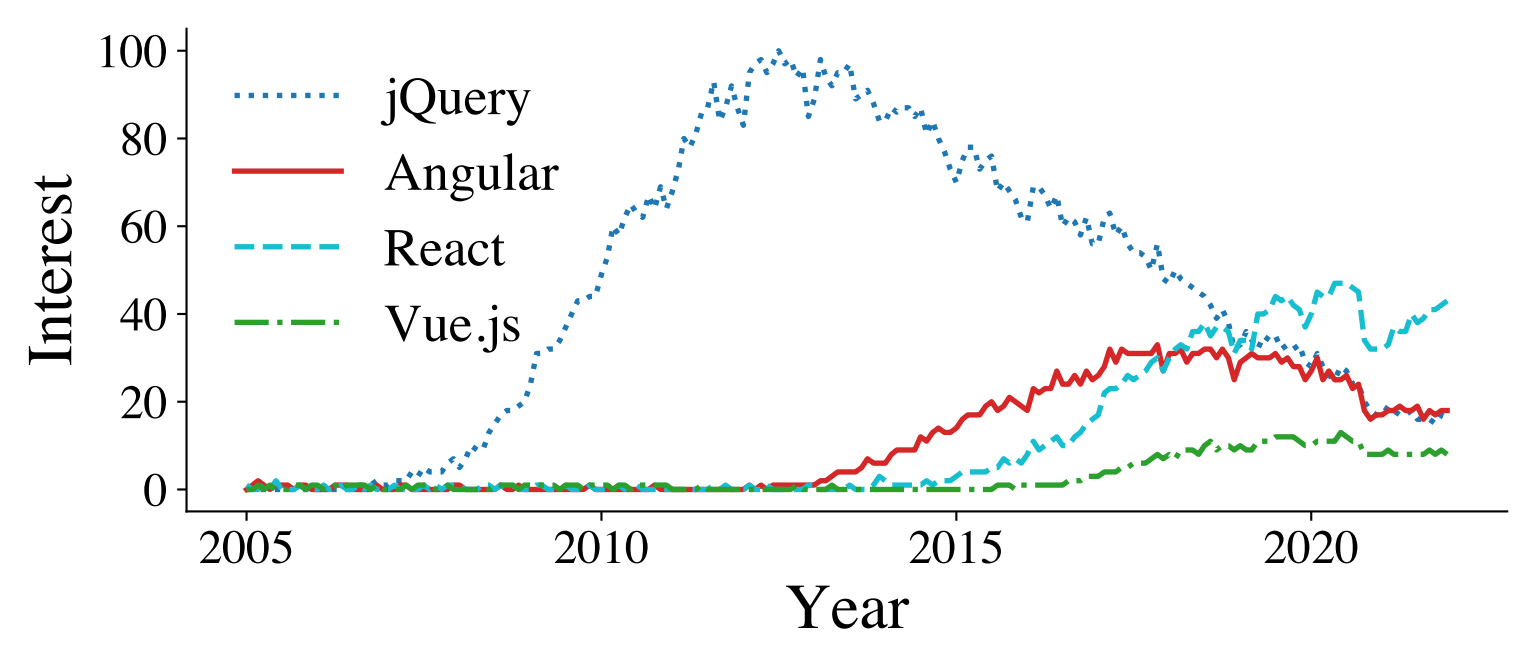

Supplement: supplementary_material [file attachment]

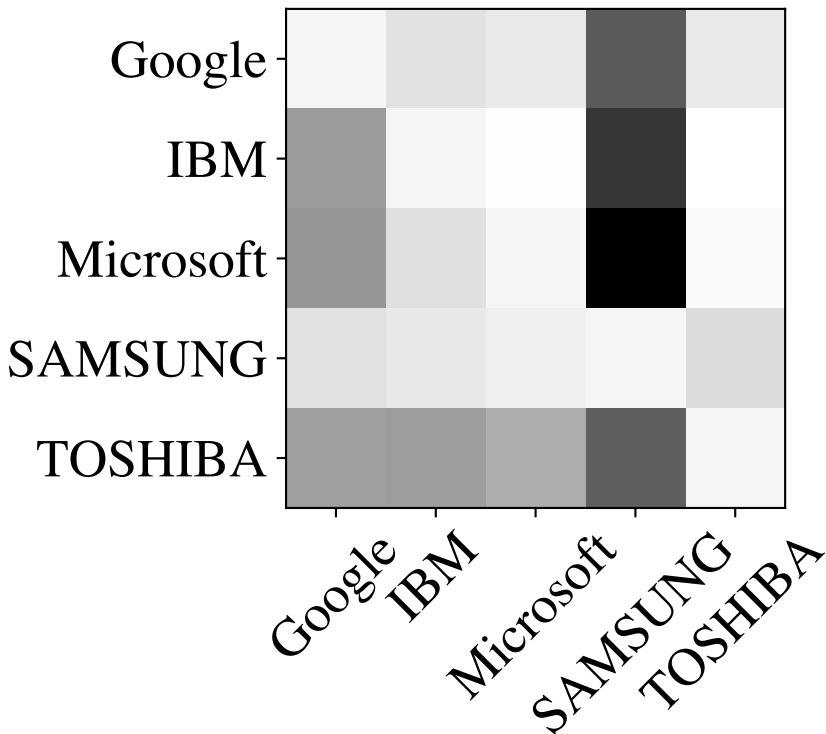

Supplement: supplementary_material [file attachment]

# of tweets/day

Minions (2015)

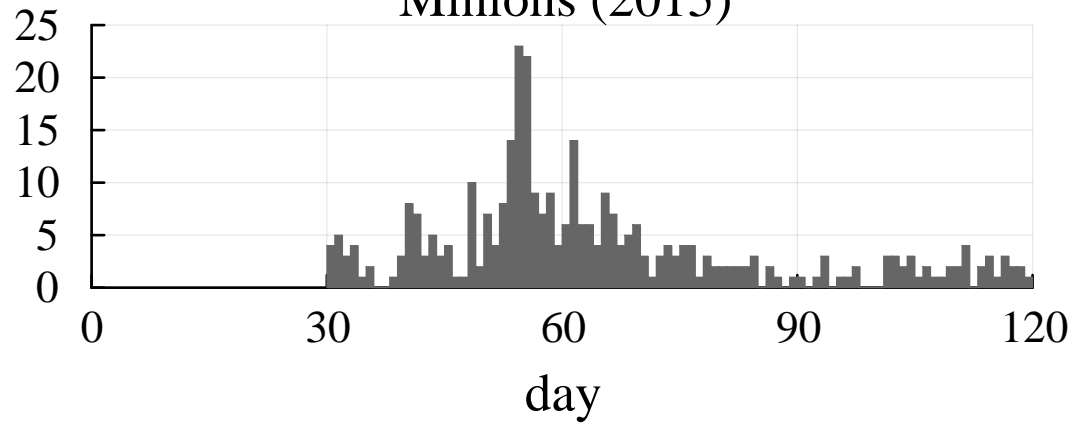

Avengers: End Game (2019)

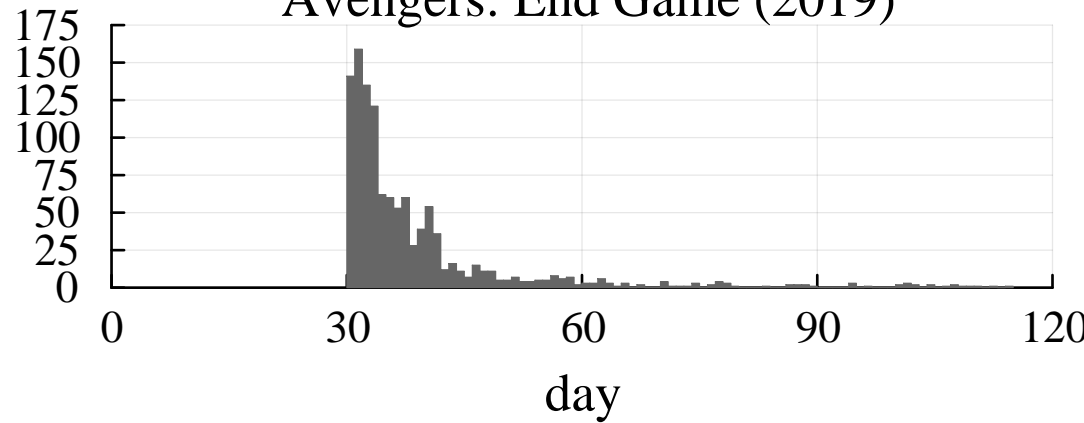

Supplement: supplementary_material [file attachment]

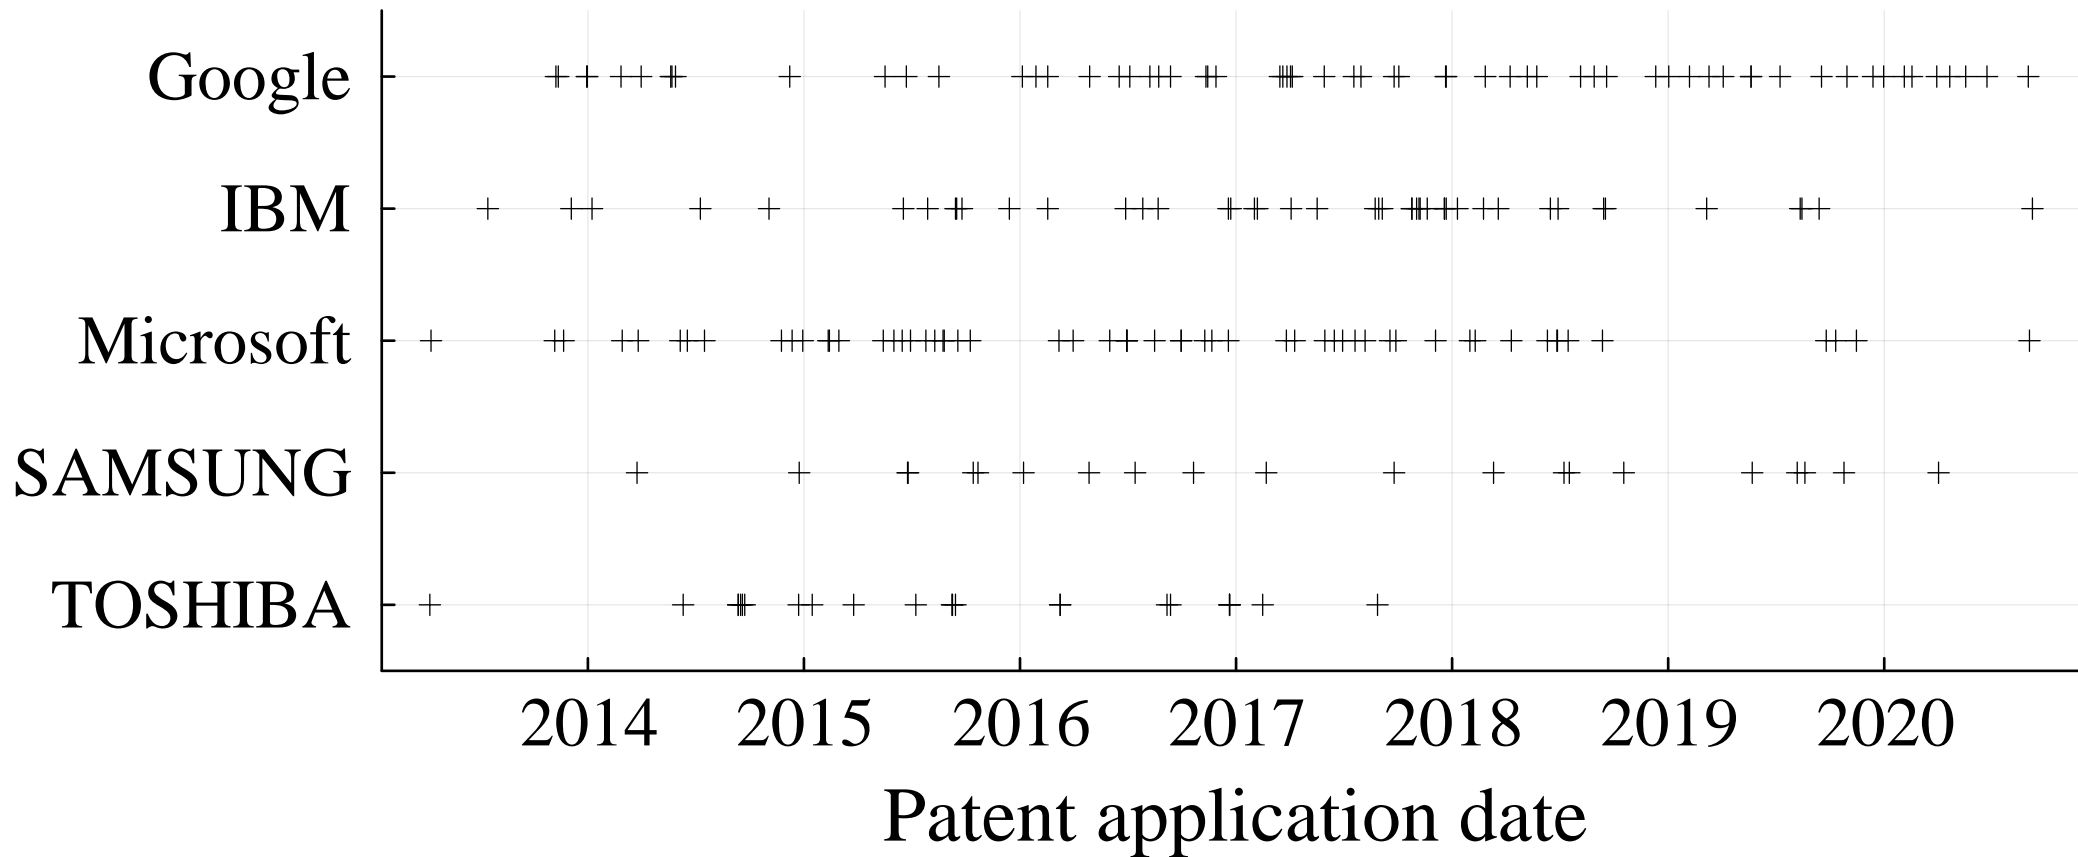

Supplement: supplementary_material [file attachment]
